# Supplementary material
Source: PubMed Central journal article supplement (PMC5637453)
Supplement: NIHMS864835-supplement-supplement_1.pdf [file NIHMS864835-supplement-supplement_1.pdf]

Table S1  
Fit Indices for 1 to 5 Class Unconditional Latent Growth Mixture Models of Depression

| Statistics                     | 1 Class | 2 Classes | 3 Classes | 4 Classes | 5 Classes |
|--------------------------------|---------|-----------|-----------|-----------|-----------|
| Akaike Information Criteria    | 8693.24 | 8477.43   | 8392.08   | 8311.98   | 8276.56   |
| Bayesian Information Criteria  | 8736.50 | 8537.99   | 8469.95   | 8407.16   | 8389.04   |
| Sample-Size Adjusted BIC       | 8704.75 | 8493.55   | 8412.81   | 8337.32   | 8306.51   |
| Entropy                        | -       | 0.87      | 0.85      | 0.86      | 0.85      |
| Lo-Mendell-Rubin Adjusted LRT  | -       | 215.30    | 89.80     | 84.74     | 41.77     |
| <i>P-value</i>                 | -       | <0.0001   | <0.05     | <0.05     | 0.37      |
| Bootsrapped LRT <i>P-value</i> | -       | <0.0001   | <0.0001   | <0.0001   | <0.0001   |

Table S2

Multinomial Logistic Regression for predictors of trajectory membership (N=535)

| Reference class             | Resilient       |               |               | Chronic Depression |              | Decreasing   |
|-----------------------------|-----------------|---------------|---------------|--------------------|--------------|--------------|
|                             | Est (SE)        |               |               | Est (SE)           |              | Depression   |
| Compared classes            | Chronic         | Decreasing    | Emergent      | Decreasing         | Emergent     | Emergent     |
|                             | Depression      | Depression    | Depression    | Depression         | Depression   | Depression   |
| Age                         | -2.90 (1.31)*   | -3.11 (1.48)* | -0.28 (1.52)  | -0.21 (1.87)       | 2.62 (1.77)  | 2.83 (1.91)  |
| Assets                      | -1.53 (3.12)    | -3.46 (4.75)  | -5.00 (2.52)* | -1.94 (7.18)       | -3.47 (4.26) | -1.53 (5.02) |
| Education                   | -0.68 (0.17)*** | -0.51 (0.16)* | -0.40 (0.19)* | 0.17 (0.24)        | 0.28 (0.21)  | 0.11 (0.25)  |
| Ethnicity/Race <sup>a</sup> | -0.07 (0.50)    | 0.34 (0.40)   | 0.20 (0.41)   | -0.27 (0.59)       | 2.62 (1.77)  | 0.54 (0.53)  |
| Gender <sup>b</sup>         | 0.87 (0.65)     | 0.52 (0.39)   | 0.81 (0.48)   | -0.35 (0.81)       | -0.07 (0.81) | 0.28 (0.62)  |
| HC: Cancer                  | 1.12 (0.55)*    | 0.76 (0.50)   | 0.08 (0.87)   | -0.36 (0.63)       | -1.04 (0.97) | -0.69 (0.94) |
| HC: Heart Prob.             | 1.24 (0.40)*    | 0.67 (0.53)   | 0.26 (0.56)   | -0.57 (0.59)       | -0.98 (0.61) | -0.40 (0.62) |
| HC: Lung Dis.               | 0.80 (0.60)     | -0.40 (0.70)  | 0.91 (0.45)*  | -1.20 (0.85)       | 0.10 (0.65)  | 1.30 (0.75)  |
| HC: Stroke                  | 1.17 (0.66)     | -0.11 (0.98)  | 0.30 (0.68)   | -1.28 (0.98)       | -0.87 (0.90) | 0.41 (1.145) |
| Marriage Length             | -0.25 (0.94)    | -0.31 (0.87)  | -1.23 (0.95)  | -0.05 (1.25)       | -0.97 (1.30) | -0.92 (1.12) |
| Previous Divorces           | 0.28 (0.30)     | -0.02 (0.28)  | -0.20 (0.31)  | -0.30 (0.39)       | -0.47 (0.38) | -0.18 (0.39) |

Note. Est = Parameter Estimate; SE = Standard Error.; HC = Chronic Health Conditions.

<sup>a</sup> Coded as 0 = Non-White, 1 =White; <sup>b</sup> Coded as 0 = Male, 1 = Female.

\* $p \leq 0.05$  ; \*\*  $p \leq 0.01$ ; \*\*\*  $p \leq 0.001$

**Table S3**

Odds Ratios for Class compared to marriage, Assets, Demographics, and Health Conditions as Predictors of Death (N = 925) by Six Years Following the Divorce.

| Variable              | Mortality |              |
|-----------------------|-----------|--------------|
|                       | OR        | [95% CI]     |
| Class <sup>a</sup> :  |           |              |
| Emergent Depression   | 2.49*     | [1.06, 5.85] |
| Decreasing Depression | 1.30      | [0.46, 3.68] |
| Chronic Depression    | 0.95      | [0.34, 2.70] |
| Resilient             | 1.10      | [0.64, 1.90] |
| Age                   | 1.01***   | [1.01-1.01]  |
| Assets                | 1.00*     | [1.00, 1.00] |
| Ethnicity: Non-white  | 1.64      | [0.94, 2.85] |
| Gender: Male          | 2.28**    | [1.37, 3.79] |
| Health Conditions:    |           |              |
| Cancer                | 1.24      | [0.79, 1.95] |
| Heart Problems        | 1.58**    | [1.15, 2.18] |
| Lung Disease          | 0.86      | [0.59, 1.26] |
| Stroke                | 0.83      | [0.38, 1.80] |

Note. OR = Odd Ratio; 95% CI = 95% Confidence Interval.

\* $p \leq 0.05$ ; \*\*  $p \leq 0.01$ ; \*\*\*  $p \leq 0.001$

<sup>a</sup>A random sample of married subjects was used as reference class. Total sample before list-wise deletion consisted of: Married:  $n = 500$ , 48 deceased; Resilient class:  $n = 380$ , 34 deceased; Chronic Depression class  $n = 68$ , 5 deceased; Decreased Depression class  $n = 59$ , 5 deceased; Emergent Depression class  $n = 51$ , 10 deceased.
